# Supplementary material for: Quantifying geographic accessibility to improve efficiency of entomological monitoring
Source: PubMed Central journal article supplement (PMC7117774; doi:10.1371/journal.pntd.0008096), 2020-03-23
Supplement: pntd.0008096.s006.pdf [file pntd.0008096.s006.pdf]

**Table S1. Results of OpenStreetMap data validation.**

| Grid         | Length of road digitized (m) |                 |                 | Percentage similarity (%) |              |              |
|--------------|------------------------------|-----------------|-----------------|---------------------------|--------------|--------------|
|              | 0.5m                         | 3m              | OSM             | OSM vs 0.5m               | 3m vs 0.5m   | OSM vs 3m    |
| 1            | 7804.60                      | 1459.33         | 0.00            | 0.00                      | 18.70        | 0.00         |
| 2            | 3471.12                      | 0.00            | 0.00            | 0.00                      | 0.00         | 0.00         |
| 3            | 7759.08                      | 3738.06         | 333.07          | 4.29                      | 48.18        | 8.91         |
| 4            | 9146.50                      | 1843.44         | 1817.94         | 19.88                     | 20.15        | 98.62        |
| 5            | 2718.92                      | 0.00            | 937.76          | 34.49                     | 0.00         | 0.00         |
| 6            | 5515.98                      | 2856.50         | 3483.76         | 63.16                     | 51.79        | 121.96       |
| 7            | 3840.01                      | 676.79          | 2254.52         | 58.71                     | 17.62        | 333.12       |
| 8            | 10131.97                     | 4607.29         | 1962.63         | 19.37                     | 45.47        | 42.60        |
| 9            | 6053.58                      | 1703.86         | 0.00            | 0.00                      | 28.15        | 0.00         |
| 10           | 2034.04                      | 0.00            | 0.00            | 0.00                      | 0.00         | 0.00         |
| 11           | 12067.40                     | 4540.82         | 3612.87         | 29.94                     | 37.63        | 79.56        |
| 12           | 8940.11                      | 2704.17         | 2082.35         | 23.29                     | 30.25        | 77.01        |
| 13           | 14452.65                     | 7053.10         | 9911.33         | 68.58                     | 48.80        | 140.52       |
| 14           | 0.00                         | 0.00            | 0.00            | 0.00                      | 0.00         | 0.00         |
| 15           | 6650.08                      | 3311.35         | 4432.14         | 66.65                     | 49.79        | 133.85       |
| 16           | 3473.59                      | 1370.35         | 5389.54         | 155.16                    | 39.45        | 393.30       |
| 17           | 6779.36                      | 772.51          | 7997.38         | 117.97                    | 11.40        | 1035.25      |
| 18           | 5637.56                      | 1214.75         | 649.64          | 11.52                     | 21.55        | 53.48        |
| 19           | 9459.31                      | 1912.29         | 0.00            | 0.00                      | 20.22        | 0.00         |
| 20           | 2429.74                      | 0.00            | 730.74          | 30.07                     | 0.00         | 0.00         |
| 21           | 4846.82                      | 2094.06         | 1343.11         | 27.71                     | 43.20        | 64.14        |
| 22           | 8722.51                      | 1564.75         | 0.00            | 0.00                      | 17.94        | 0.00         |
| 23           | 8715.20                      | 204.00          | 0.00            | 0.00                      | 2.34         | 0.00         |
| 24           | 15891.30                     | 4044.70         | 1064.19         | 6.70                      | 25.45        | 26.31        |
| 25           | 8491.67                      | 2918.87         | 1285.66         | 15.14                     | 34.37        | 44.05        |
| <b>Total</b> | <b>175033.09</b>             | <b>50590.99</b> | <b>49288.63</b> | <b>28.16</b>              | <b>28.90</b> | <b>97.43</b> |
